# Supplementary material for: Morphological Control of Microbial Ecosystems and Carbon Cycling in Greenlandic Cryoconite Holes
Source: Research Square preprint supplement (doi:10.21203/rs.3.rs-7116261/v1), 2025-07-22
Supplement: Supplementary file 1 [file 0df097eb00a9ac2f6ff9bedd.docx]

**Supplemental Information**

**Morphological Control of Microbial Ecosystems and Carbon Cycling in Greenlandic Cryoconite Holes**

Takeuchi et al.

**This PDF file includes:**

Supplemental Table 1

Supplemental Figures 1–5

**Table S1: Geochemical data for cryoconite and meltwater from cryoconite holes on Issunguata Sermia Glacier in southwest Greenland.**

| Site | Cryoconite | | | | | | Meltwater | | | | | | | | | | | |
| --- | --- | --- | --- | --- | --- | --- | --- | --- | --- | --- | --- | --- | --- | --- | --- | --- | --- | --- |
|  | OM | N | C | C/N | δ15N | δ13C | δ18O | δD | Cl- | NO2- | NO3- | PO43- | SO42- | Na+ | NH4+ | K+ | Mg2+ | Ca2+ |
|  | w% | w% | w% | w/w | ‰ | ‰ | ‰ | ‰ | ppb | ppb | ppb | ppb | ppb | ppb | ppb | ppb | ppb | ppb |
| S1 | 1.7 | 0.1 | 0.7 | 8.2 | -1.1 | -20.2 | -26.7 | -211 | 25.8 | 0.0 | 11.3 | 0.0 | 18.8 | 17.7 | 0.0 | 67.3 | 24.4 | 68.2 |
| S2 | 1.4 | 0.1 | 0.6 | 9.5 | -1.7 | -22.4 | -27.2 | -214 | 9.0 | 0.0 | 9.4 | 0.0 | 0.0 | 5.7 | 0.0 | 22.9 | 13.0 | 56.0 |
| S3 | 1.1 | 0.0 | 0.3 | 12.9 | -1.8 | -22.5 | -28.2 | -219 | 16.5 | 0.0 | 6.8 | 0.0 | 0.0 | 25.8 | 0.0 | 67.8 | 26.1 | 112.4 |
| S4 | 2.9 | 0.1 | 1.3 | 10.5 | -1.3 | -22.5 | -33.5 | -265 | 12.1 | 0.0 | 24.7 | 62.5 | 689.9 | 12.1 | 0.0 | 24.7 | 62.5 | 689.9 |
| S5 | 1.9 | 0.1 | 0.7 | 10.9 | -2.4 | -21.4 | -28.3 | -216 | 7.0 | 0.0 | 27.2 | 11.9 | 71.4 | 7.0 | 0.0 | 27.2 | 11.9 | 71.4 |
| S6 | 3.0 | 0.1 | 1.1 | 9.6 | -0.6 | -23.1 | -26.8 | -208 | 53.4 | 0.0 | 26.0 | 6.7 | 37.7 | 53.4 | 0.0 | 26.0 | 6.7 | 37.7 |
| S7 | 2.6 | 0.2 | 1.5 | 8.2 | 0.9 | -20.9 | -26.5 | -205 | 18.3 | 0.3 | 71.7 | 42.3 | 37.5 | 18.3 | 0.3 | 71.7 | 42.3 | 37.5 |
| S8 | 1.3 | 0.1 | 0.6 | 9.1 | -2.0 | -23.6 | -25.9 | -194 | 64.6 | 0.0 | 28.9 | 9.2 | 33.3 | 64.6 | 0.0 | 28.9 | 9.2 | 33.3 |
| S9 | 5.7 | 0.3 | 2.3 | 9.1 | -1.1 | -22.3 | -24.5 | -181 | 9.5 | 1.7 | 30.2 | 13.5 | 17.9 | 9.5 | 1.7 | 30.2 | 13.5 | 17.9 |
| S10 | 5.4 | 0.2 | 2.3 | 9.2 | 0.7 | -21.7 | -27.2 | -200 | 108.7 | 0.0 | 28.1 | 36.0 | 33.0 | 108.7 | 0.0 | 28.1 | 36.0 | 33.0 |
| S11 | 6.7 | 0.3 | 2.8 | 9.2 | 0.8 | -21.3 | -24.8 | -187 | 14.9 | 4.0 | 81.2 | 35.2 | 19.4 | 14.9 | 4.0 | 81.2 | 35.2 | 19.4 |
| S12 | 4.9 | 0.2 | 2.4 | 9.7 | -0.8 | -22.4 | -27.4 | -211 | 46.4 | 0.0 | 169.7 | 51.8 | 41.5 | 46.4 | 0.0 | 169.7 | 51.8 | 41.5 |
| S13 | 6.9 | 0.3 | 2.9 | 9.8 | 0.4 | -20.0 | -25.6 | -197 | 40.5 | 16.4 | 84.3 | 31.6 | 46.0 | 40.5 | 16.4 | 84.3 | 31.6 | 46.0 |
| S14 | 8.0 | 0.4 | 3.5 | 9.9 | 0.6 | -19.7 | -27.1 | -207 | 7.9 | 1.4 | 41.8 | 14.1 | 11.6 | 7.9 | 1.4 | 41.8 | 14.1 | 11.6 |
| S15 | 8.8 | 0.4 | 4.1 | 11.0 | 0.3 | -19.5 | -26.3 | -201 | 40.1 | 16.3 | 185.9 | 88.5 | 56.1 | 40.1 | 16.3 | 185.9 | 88.5 | 56.1 |
| S16 | 6.7 | 0.3 | 3.1 | 10.0 | 0.3 | -20.2 | -25.3 | -192 | 23.5 | 28.7 | 103.9 | 65.7 | 40.2 | 23.5 | 28.7 | 103.9 | 65.7 | 40.2 |
| S17 | 6.6 | 0.3 | 2.6 | 10.0 | 1.1 | -19.8 | -24.2 | -180 | 10.5 | 2.0 | 27.0 | 11.8 | 16.8 | 10.5 | 2.0 | 27.0 | 11.8 | 16.8 |
| S18 | 6.9 | 0.3 | 2.6 | 10.1 | 0.6 | -19.9 | -25.3 | -193 | 21.2 | 11.3 | 79.1 | 42.4 | 26.6 | 21.2 | 11.3 | 79.1 | 42.4 | 26.6 |
| S19 | 7.9 | 0.3 | 3.3 | 10.2 | 1.1 | -20.2 | -25.0 | -190 | 22.1 | 11.5 | 69.8 | 38.7 | 27.4 | 22.1 | 11.5 | 69.8 | 38.7 | 27.4 |
| S20 | 6.0 | 0.3 | 3.2 | 10.4 | 1.0 | -19.7 | -25.2 | -190 | 25.2 | 7.8 | 59.7 | 48.4 | 32.0 | 25.2 | 7.8 | 59.7 | 48.4 | 32.0 |
| Mean | 4.8 | 0.2 | 2.1 | 9.9 | -0.3 | -21.2 | -26.5 | -203 | 28.9 | 5.1 | 58.3 | 30.5 | 62.9 | 28.8 | 5.1 | 64.9 | 33.7 | 73.7 |
| S.D. | 2.6 | 0.1 | 1.2 | 1.0 | 1.2 | 1.3 | 2.0 | 19 | 24.9 | 7.9 | 49.7 | 25.0 | 148.6 | 25.0 | 7.9 | 46.0 | 22.0 | 146.9 |

**Figure S1. Phylogenetic relationships among ASV sequences and single-filament PCR sequences obtained in this study.** A maximum likelihood tree was constructed using IQ-TREE version 1.6.12 (Nguyen et al., 2015). *Gloeobacter violaceus* PCC 7421 (AF132790.1) was used as an outgroup. Representative sequences identified in this study are shown in bold. “ASV” indicates ASV sequences, and “Single filament PCR” indicates single-filament PCR sequences.


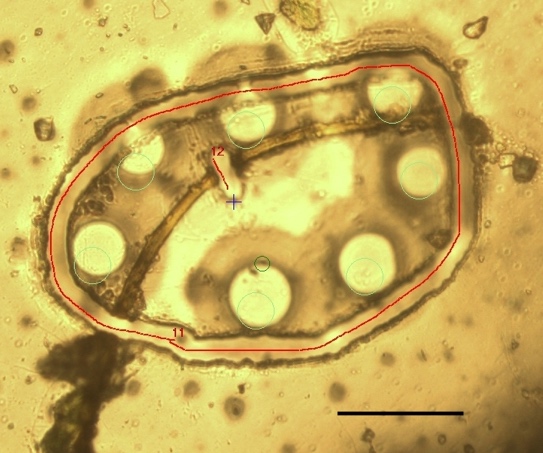

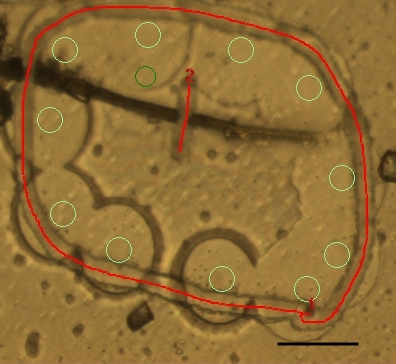


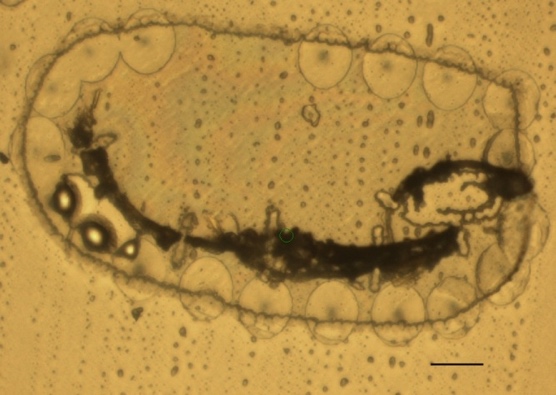

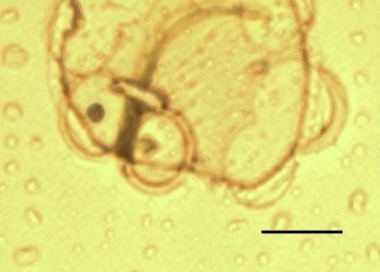


**Figure S2: Cyanobacterial cells recovered by single-filament PCR analysis to directly identify the phylotypes comprising cryoconite granules in deeper cryoconite holes.** Scale bars represent 50 µm in all images.

**Figure S3: Distribution of the major cyanobacterial ASVs among the samples.** The heatmap shows the relative abundance (%) of ASV reads within each sample. The effect size, Wilcoxon p-value, and Benjamini-Hochberg (BH)-corrected p-value, calculated using ALDEx2 to assess the differential abundance between the shallower and deeper holes, are also presented. Absolute effect size ≥ 1 or BH-corrected p-value < 0.1 were colored in red.


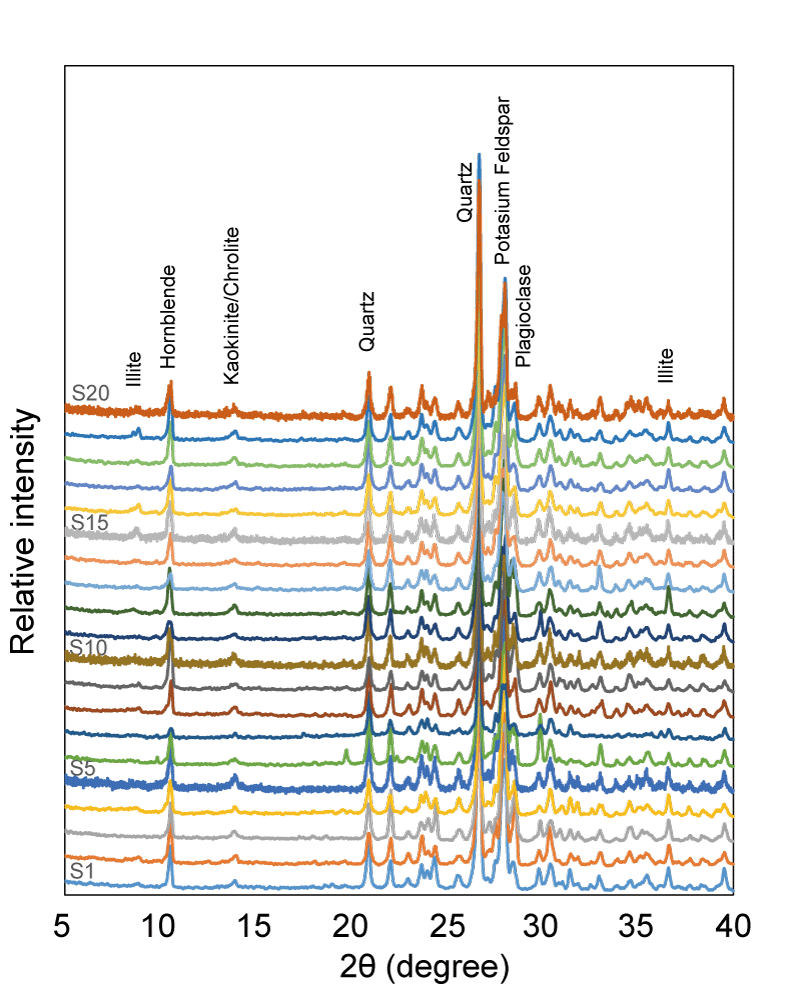


**Figure S4: XRD spectra for all samples of cryoconite collected from S1 to S20.**


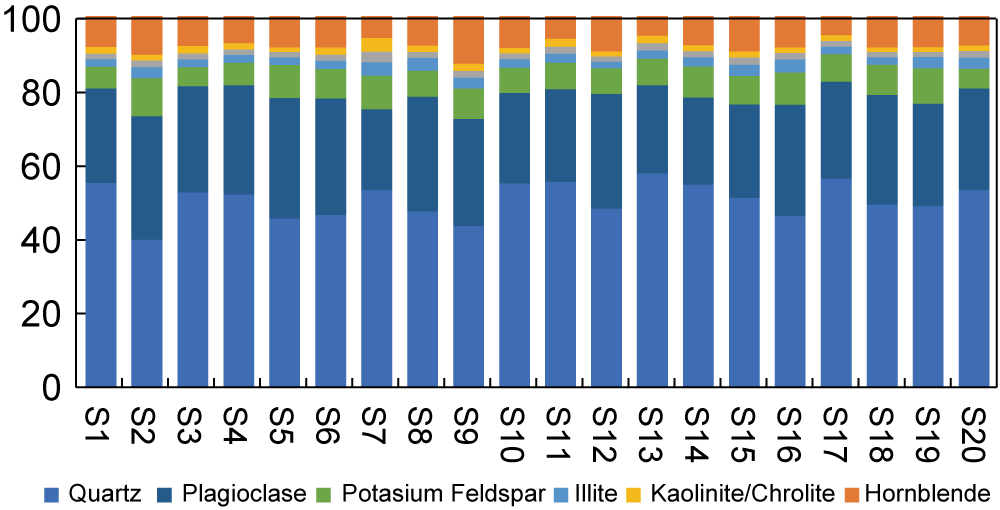


**Figure S5: Comparison of the relative peak intensities of the XRD spectra for all samples of cryoconite collected from S1 to S20.**
